# Supplementary material for: Rapid development of neutralizing and diagnostic SARS-COV-2 mouse monoclonal antibodies
Source: PubMed Central journal article supplement (PMC8102525; doi:10.1038/s41598-021-88809-0), 2021-05-06
Supplement: 41598_2021_88809_MOESM1_ESM.pdf [file 41598_2021_88809_MOESM1_ESM.pdf]

## Supplementary Information

### Rapid Development of Neutralizing and Diagnostic SARS-COV-2 Mouse Monoclonal Antibodies

Asheley P. Chapman,<sup>1</sup> Xiaoling Tang,<sup>2‡</sup> Joo R. Lee,<sup>2‡</sup> Asiya Chida,<sup>2‡</sup> Kristina Mercer,<sup>3</sup> Rebekah E. Wharton,<sup>3</sup> Markus Kainulainen,<sup>4</sup> Jennifer L. Harcourt,<sup>5</sup> Roosecelis B. Martines,<sup>6</sup> Michelle Schroeder,<sup>1</sup> Liangjun Zhao,<sup>1</sup> Anton Bryksin,<sup>7</sup> Bin Zhou,<sup>8</sup> Eric Bergeron,<sup>4</sup> Brigid C. Bollweg,<sup>6</sup> Azaibi Tamin,<sup>5</sup> Natalie Thornburg,<sup>5</sup> David E. Wentworth,<sup>8</sup> David Petway,<sup>2</sup> Dennis Bagarozzi, Jr.,<sup>2</sup> M.G. Finn,<sup>1,9\*</sup> Jason M. Goldstein<sup>2\*</sup>

<sup>1</sup> School of Chemistry and Biochemistry, Georgia Institute of Technology, 901 Atlantic Dr., Atlanta, GA, USA, 30306

<sup>2</sup> Immunodiagnostic Development Team/ Reagent Diagnostic Services Branch (RDSB)/DSR/NCEZID/CDC, 1600 Clifton Rd NE. Atlanta, GA, USA, 30333

<sup>3</sup> Division of Laboratory Sciences DLS/NCEH/CDC, 4770 Buford Hwy, Atlanta, GA 30341, USA

<sup>4</sup> Viral Special Pathogens Branch VSPB/DHCPP/NCEZID/CDC, 1600 Clifton Rd NE. Atlanta, GA, USA, 30333

<sup>5</sup> Respiratory Disease Branch (RDB)/DVD/NCIRD/CDC, 1600 Clifton Rd NE. Atlanta, GA, USA, 30333

<sup>6</sup> Infectious Disease Pathology Branch (IDPB)/DHCPP/NCEZID/CDC, 1600 Clifton Rd NE. Atlanta, GA, USA, 30333

<sup>7</sup> Parker H. Petit Institute for Bioengineering and Bioscience, Georgia Institute of Technology, Atlanta, GA, USA, 30306

<sup>8</sup> Vaccine Preparedness Team/ Virology Surveillance and Diagnosis Branch (VSPB)/ID/NCIRD/CDC, 1600 Clifton Rd NE. Atlanta, GA, USA, 30333

<sup>9</sup> School of Biological Sciences, Georgia Institute of Technology, 901 Atlantic Dr., Atlanta, GA, USA, 30306

\*Corresponding authors: [mgfinn@gatech.edu](mailto:mgfinn@gatech.edu), [fex0@cdc.gov](mailto:fex0@cdc.gov)

‡Authors provided equivalent contributions

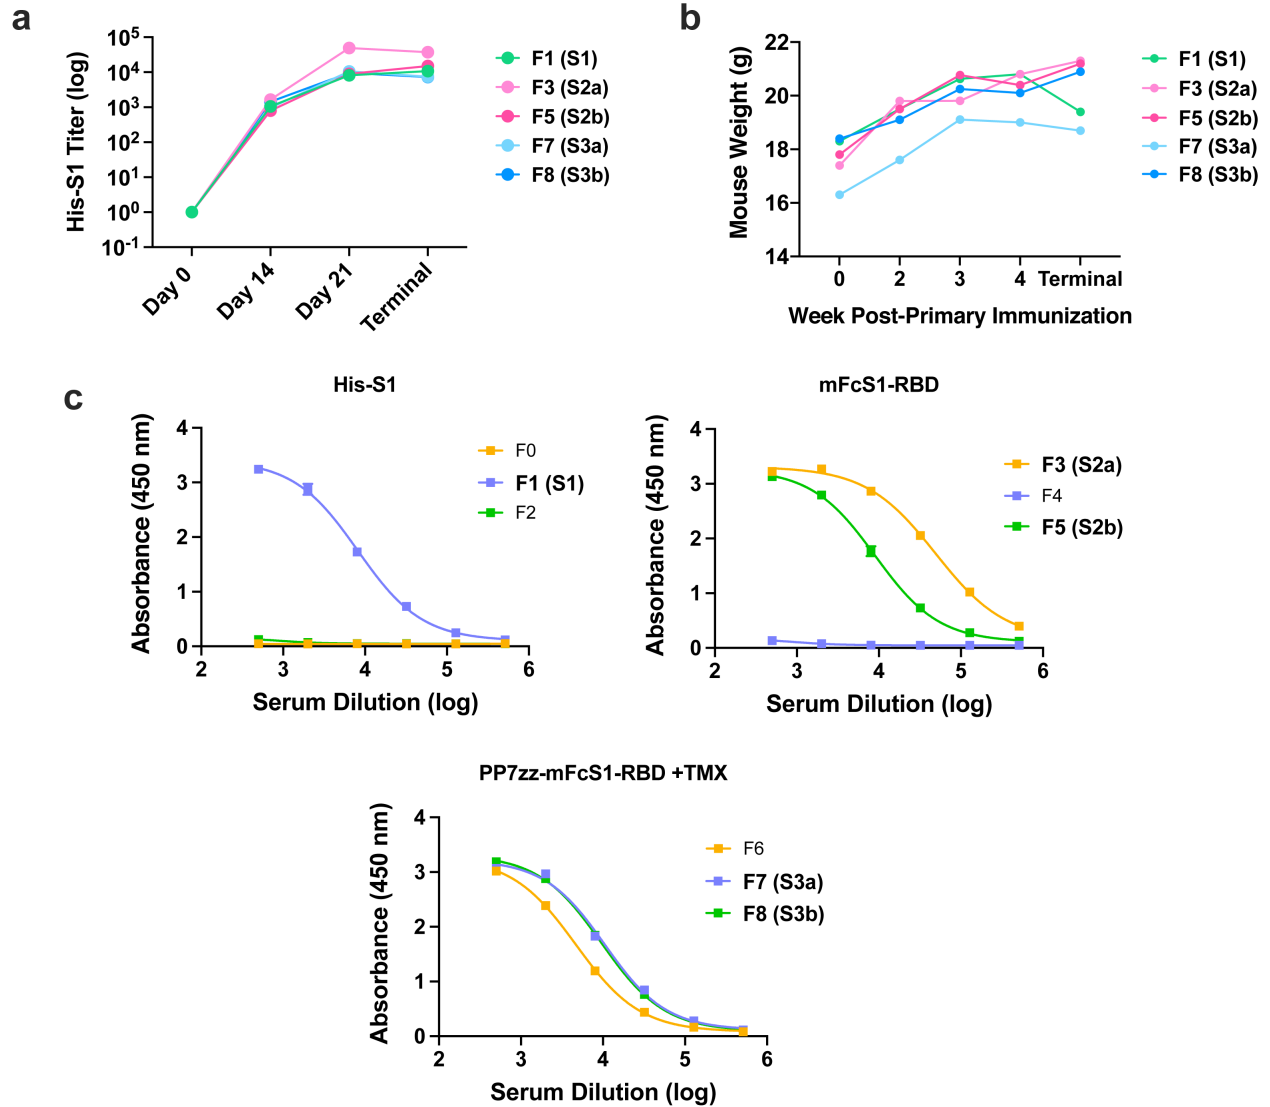

**Figure S1. SARS-COV-2 Spike protein subunit vaccine safety and humoral immune response in mice.** **a**, Anti-S1 titers over time (fusion mice only) measured by ELISA against His-S1. Day 0 is preimmune sera, Day 14 is two weeks after prime (blood taken prior to boost 1), Day 21 is one week after the first boost, Terminal sera is Day 30. **b**, Fusion mouse weight over the course of vaccine schedule (n=5). **c**, Vaccine response at day 21 as assessed by ELISA. Immunized mouse sera from each group was collected, diluted, and tested against His-S1 (1  $\mu\text{g/mL}$ ) (F1: His-S1 + Titermax Gold [Series 1]; F3 and F5: mFcS1-RBD + Titermax [Series 2]; F7-F8: PP7zzmFcS1-RBD + Titermax Gold adjuvant [Series 3]).

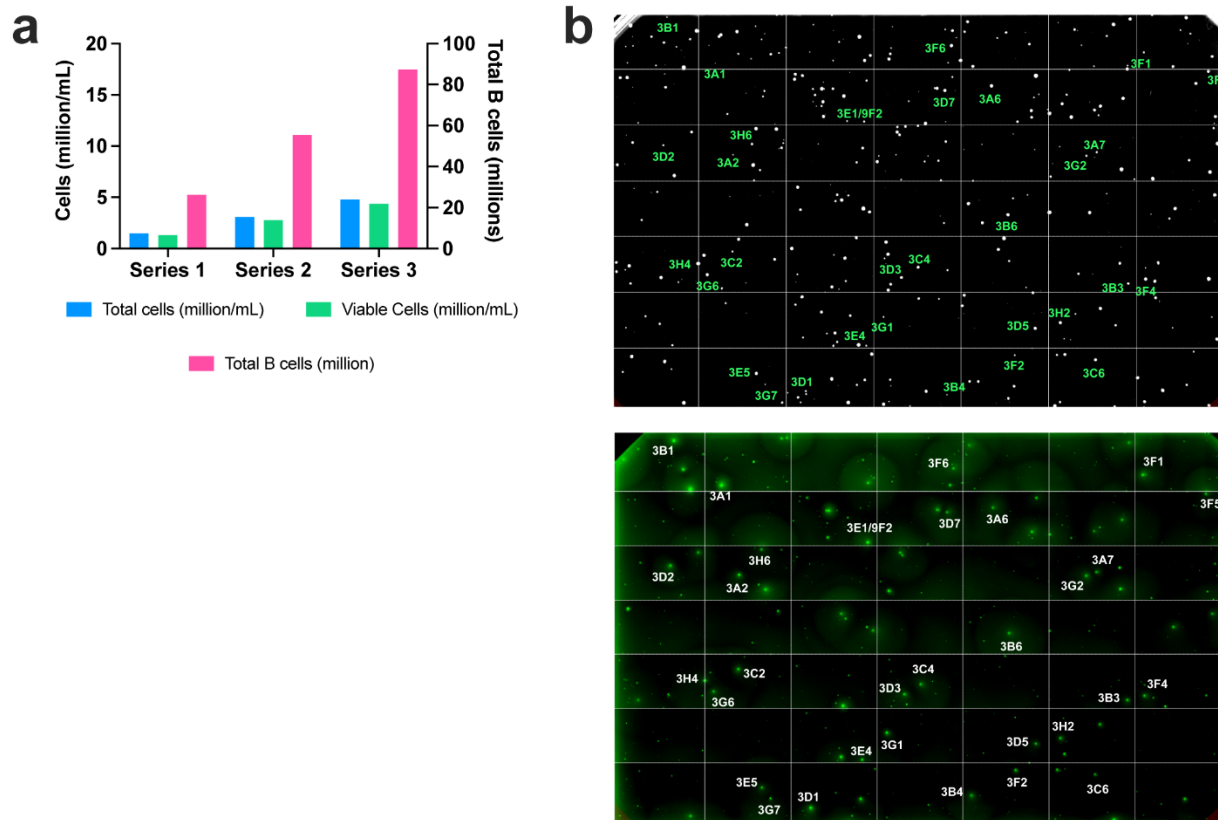

**Figure S2. Hybridoma statistics from SARS-COV-2 immunized mice.** **a**, Total cell yield and B cell yield from mice immunized with either His-tag S1 (Series 1), mouse Fc-tagged S1 Receptor Binding Domain (Series 2), or codelivery of mFcRBD by complexation with PP7zz VLPs (Series 3), all in emulsion with Titermax Gold. **b**, Representative images from 3D culture of IgG secreting hybridoma from the combined B cells harvested from two mice immunized with mFcRBD. (*top*) brightfield, (*bottom*) anti-IgG FITC. Clones were chosen by ClonePix2 based on morphology of each clone and the diameter and brightness of the FITC halo, indicating the level of IgG secretion. IgG secretion measured using CloneDetect anti-IgG-FITC reagent (Mouse IgH (H+L) specific fluorescein-PN) and detected by ClonePix II instrument.

**Table S1. Hybridoma statistics from SARS-COV-2 immunized mice.**

| <b>[Fusion #],<br/>initial<br/>immunogen,<br/>(mice used)</b> | <b>Total<br/>B cells<br/>fused</b> | <b>Clones<br/>detected<br/>(fusion<br/>efficiency)</b> | <b>High/Low<br/>FITC<br/>clones<br/>detected<br/>(%)</b> | <b>Clones spike<br/>reactive<br/>(total clones<br/>picked)</b> | <b>Clones<br/>dual<br/>antigen<br/>reactive</b> | <b>Clones<br/>with ecto<br/>preference</b> | <b>Clones<br/>with S1<br/>reactive<br/>preference</b> |
|---------------------------------------------------------------|------------------------------------|--------------------------------------------------------|----------------------------------------------------------|----------------------------------------------------------------|-------------------------------------------------|--------------------------------------------|-------------------------------------------------------|
| [1] SARS-COV-2 His S1 (mouse F1)                              | 25 x 10 <sup>6</sup>               | 699<br>(2.8 x 10 <sup>-5</sup> )                       | 16/304<br>(5.2%)                                         | 27 (282)                                                       | 15                                              | 3                                          | 9                                                     |
| [2] SARS-COV-2 mFcRBD (mice F3 + F5)                          | 55                                 | 667<br>(1.2 x 10 <sup>-5</sup> )                       | 85/184<br>(46.1%)                                        | 157 (258)                                                      | 107                                             | 48                                         | 2                                                     |
| [3] SARS-COV-2 PP7zzmFcRBD + TiterMax (mice F7 + F8)          | 75                                 | 307<br>(0.41 x 10 <sup>-5</sup> )                      | 4/8<br>(50%)                                             | 2 (12)                                                         | 1                                               | 1                                          | 0                                                     |
| <b>Totals</b>                                                 | <b>155</b>                         | <b>1673 clones</b>                                     | <b>105/496<br/>(21.2%)</b>                               | <b>186 (552)</b>                                               | <b>123</b>                                      | <b>52</b>                                  | <b>11</b>                                             |

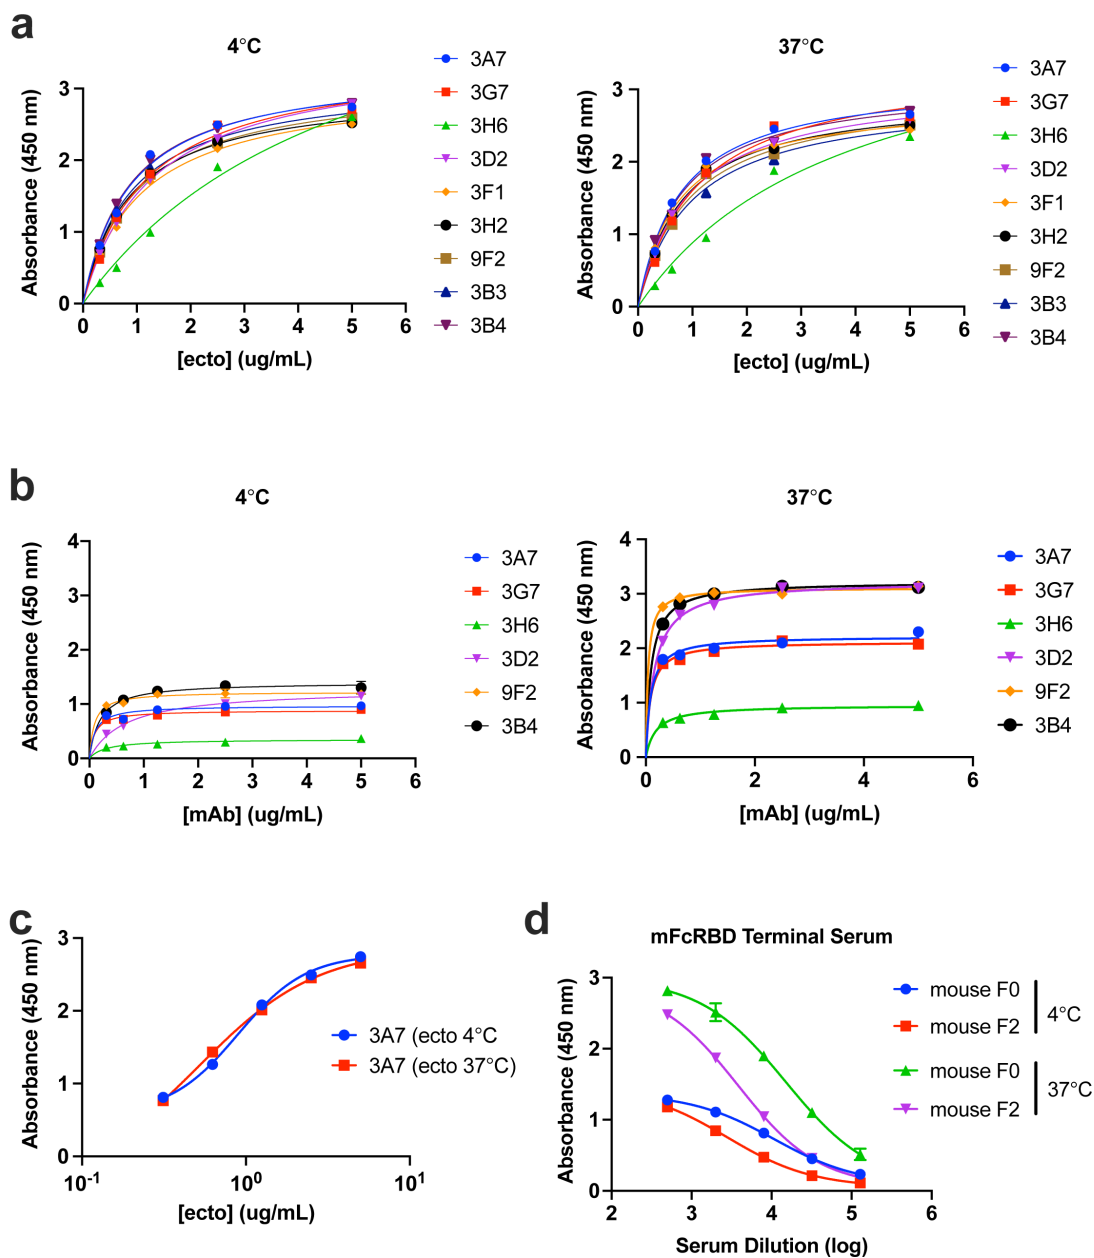

**Figure S3. Thermal stability of SARS-CoV-2 spike ectodomain.** **a**, Decreasing concentrations of r-spike ecto protein were plated on streptavidin coated 96-well plates (5 ug/mL), with the protein either used directly from storage at 4°C or after 1 h incubation at 37°C. The indicated monoclonal antibodies were then introduced (10  $\mu$ g/mL) and incubated for 1 h. After washing, goat anti-mouse IgG-HRP reporter (1:2000 dilution) was added for 1 h, and plates were developed with Ultra-TMB substrate (30 s) and quenched with 2N H<sub>2</sub>SO<sub>4</sub>. **b**, After equilibration at 4°C or 37°C for one hour, r-spike ecto was plated at 0.5  $\mu$ g/mL for one hour followed by incubation with decreasing concentrations of select mAbs (5  $\mu$ g/mL – 0  $\mu$ g/mL) under the conditions described for panel (a). **c**, Comparative binding profile of anti-RBD mAb 3A7 to r-spike ecto plated after temperature equilibration at either 4°C or 37°C. **d**, Terminal sera ELISA from mice immunized with mFcRBD (from which 32 out of 33 selected mAbs originated) against temperature-varied r-spike ecto (0.5  $\mu$ g/mL).

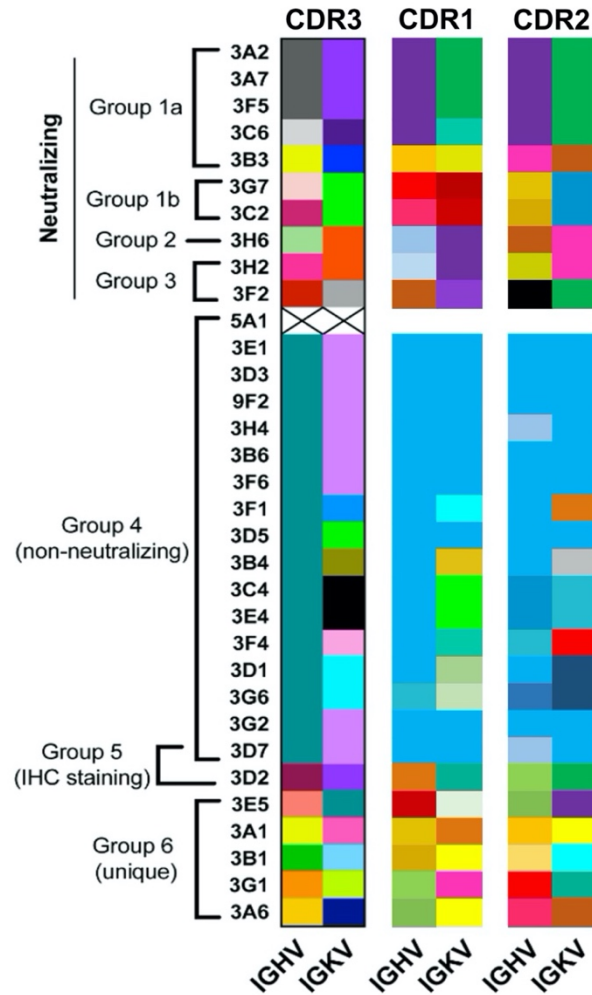

**Figure S4. Sequence relationships in complementarity-determining regions.** CDR3 portion is shown in Figure 3e of the main paper and represents gene usage. Color coding for CDR1 and CDR2 is based on sequence similarity for these much shorter regions (generally, 3-12 amino acids). Closely related sequences for each CDR are indicated by colors with similar hue. No similarity is implied by identical or related colors between columns. Unique mAbs are unique across CDRs, mAbs clustered by CDR3 maintain those trends across CDRs as well. See Tables S2 and S3 for CDR sequences.

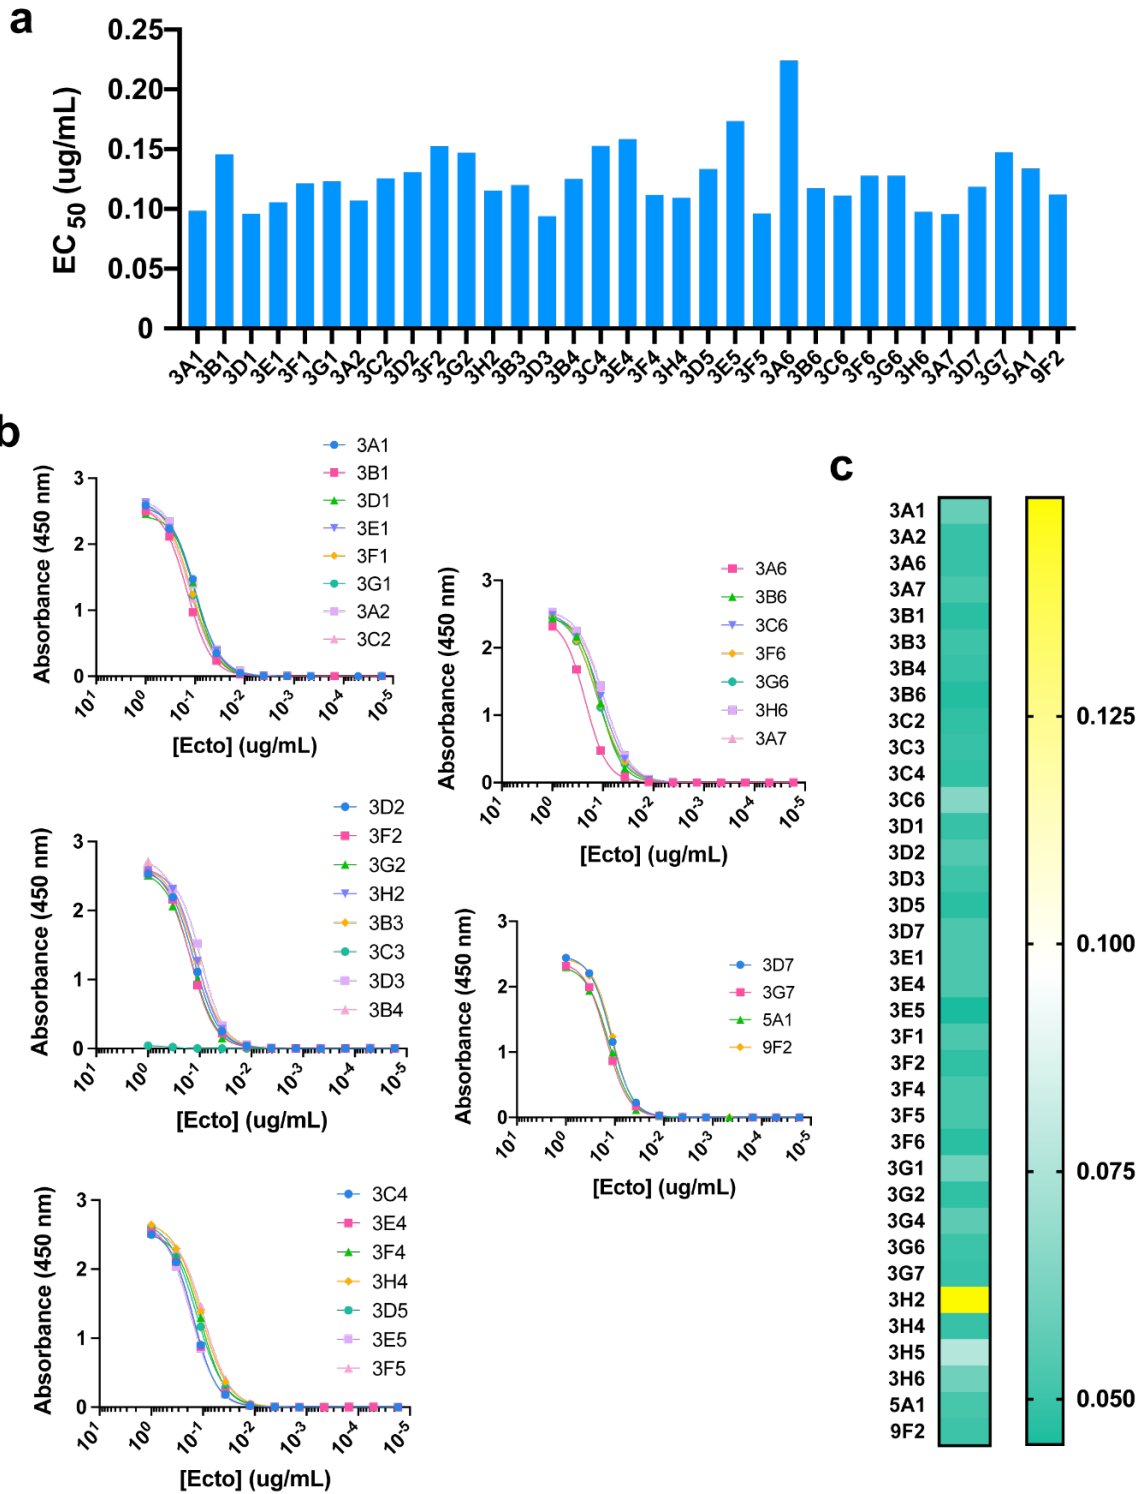

**Figure S5. EC<sub>50</sub> values for binding to plated r-spike ecto.** **a**, EC<sub>50</sub> (µg/mL) of SARS-CoV-2 mAbs to trimeric spike ectodomain, calculated using EC<sub>50</sub> shift nonlinear regression (GraphPad Prism v.8) from plots in panel (b). **b**, Indirect ELISA mAb (1 µg/mL) sensitivity to spike ectodomain (titration beginning at 1 µg/mL). **c**, Qualitative response (optical density) from indirect ELISA of mAbs against plated heat-inactivated SARS-CoV-2 (obtained from ATCC).

**Table S2. Sequences and amino acid lengths of heavy chain CDRs for 32 SARS-CoV-2 monoclonal antibodies.** mAbs were sequenced by Illumina next generation sequencing, and heavy and light chain variable gene and CDR3 regions assigned by MiXIR software. Corresponding epitope bins are included, as determined by competitive BLI and summarized in Figure S5.

| mAb        | Bin       | Heavy Chain Sequence |        |            |        |                    |        |
|------------|-----------|----------------------|--------|------------|--------|--------------------|--------|
|            |           | CDR1                 | length | CDR2       | length | CDR3               | length |
| <b>3A2</b> | <b>1a</b> | GFSLSTSGMG           | 10     | IYWDDDK    | 7      | CARRGPLITTDGTFD VW | 17     |
| <b>3A7</b> | <b>1a</b> | GFSLSTSGMG           | 10     | IYWDDDK    | 7      | CARRGPLITTDGTFD VW | 17     |
| <b>3F5</b> | <b>1a</b> | GFSLSTSGMG           | 10     | IYWDDDK    | 7      | CARRGPLITTDGTFD VW | 17     |
| <b>3C6</b> | <b>1a</b> | GFSLSTSGMG           | 10     | IYWDDDK    | 7      | CARRGPLITTDGTFD VW | 17     |
| <b>3B3</b> | <b>1a</b> | GYSITS DYA           | 9      | ISYSGTT    | 7      | CAGRRGAYYGNYEEDYW  | 17     |
| <b>3G7</b> | <b>1b</b> | GYSFTSYW             | 8      | IHPDSET    | 8      | CARSSGYDWYFDVW     | 14     |
| <b>3C2</b> | <b>1b</b> | GYAFTSYW             | 8      | IYPGDGAT   | 8      | CARSSGYDWYFDVW     | 14     |
| <b>3H6</b> | <b>2</b>  | GFTFNTYA             | 8      | IRSKSDNFAM | 10     | CASYDGYRAWFAYW     | 14     |
| <b>3H2</b> | <b>3</b>  | GNTFSNYW             | 8      | ILPGSDST   | 8      | CARNRFYWFYFDVW     | 13     |
| <b>3F2</b> | <b>3</b>  | GYTFSTYS             | 8      | VYPGNDDT   | 8      | CARDGYFAMDYW       | 12     |
| <b>3E1</b> | <b>4</b>  | GFNIKDTY             | 8      | IDPANGNT   | 8      | CARTYYYGSSYEAMDYW  | 17     |
| <b>3D3</b> | <b>4</b>  | GFNIKDTY             | 8      | IDPANGNT   | 8      | CARTYYYGSSYEAMDYW  | 17     |
| <b>9F2</b> | <b>4</b>  | GFNIKDTY             | 8      | IDPANGNT   | 8      | CARTYYYGSSYEAMDYW  | 17     |
| <b>3H4</b> | <b>4</b>  | GFNIKDTY             | 8      | IDPANGNS   | 8      | CARSYYDYDGGGCFDYW  | 17     |
| <b>3B6</b> | <b>4</b>  | GFNIKDTY             | 8      | IDPASGNT   | 8      | CARSYYTYDGFFDVW    | 15     |
| <b>3F6</b> | <b>4</b>  | GFNIKDTY             | 8      | IDPASGNT   | 8      | CARSYYTYDGFFDVW    | 15     |
| <b>3F1</b> | <b>4</b>  | GFNIKDTY             | 8      | IDPANGNT   | 8      | CVSGYYYYGSPYGAMDYW | 18     |
| <b>3D5</b> | <b>4</b>  | GFNIKDTY             | 8      | IDPANGNT   | 8      | CTRYYYGSSGFFDVW    | 15     |
| <b>3B4</b> | <b>4</b>  | GFNIKDTY             | 8      | IDPANGDT   | 8      | CARSYYYGTTSWFASW   | 16     |
| <b>3C4</b> | <b>4</b>  | GFNIKDTY             | 8      | IDPASGKT   | 8      | CASGYDVNYELDYW     | 14     |
| <b>3E4</b> | <b>4</b>  | GFNIKDTY             | 8      | IDPASGKT   | 8      | CASGYDVNYELDYW     | 14     |
| <b>3F4</b> | <b>4</b>  | GFNIKDTY             | 8      | IDPANDNT   | 8      | CTRYDYVYAMDYW      | 14     |
| <b>3D1</b> | <b>4</b>  | GFNIKDTY             | 8      | IDPANGNT   | 8      | CARWDFGNYVDYAMDYW  | 17     |
| <b>3G6</b> | <b>4</b>  | GFNIKDTN             | 8      | IDPANGDT   | 8      | CARLNYDGYDYAMDYW   | 17     |
| <b>3G2</b> | <b>4</b>  | GFNIKDTY             | 8      | IDPANGNT   | 8      | CTRYYYGSSGFFDVW    | 15     |
| <b>3D7</b> | <b>5</b>  | GFNIKDTY             | 8      | IDPANGNS   | 8      | CARSYYDYDGGGCFDYW  | 17     |
| <b>3D2</b> | <b>5</b>  | GYTFSTYW             | 8      | INPYTDYT   | 8      | CARRYGNYDAWFTYW    | 15     |
| <b>3E5</b> | <b>6</b>  | GYSFTGYF             | 8      | INPYNGDT   | 8      | CGLRITYW           | 7      |
| <b>3A1</b> | <b>6</b>  | GYSITGDYS            | 9      | IHYSGSA    | 7      | CARWGNKGKNAMDYW    | 14     |
| <b>3B1</b> | <b>6</b>  | GYSITSGYY            | 9      | IYDGTN     | 7      | CARVDYDVGHWFAYW    | 15     |
| <b>3G1</b> | <b>6</b>  | GFSLTSYG             | 8      | IWSGGST    | 7      | CAKYRYDSFAYW       | 12     |
| <b>3A6</b> | <b>6</b>  | GFSLISYG             | 8      | IWAGGST    | 7      | CGRDYGILLIDYW      | 13     |



**Table S3. Sequences and amino acid lengths of light chain CDRs for 32 SARS-CoV-2 monoclonal antibodies.** mAbs were sequenced by Illumina next generation sequencing, and heavy and light chain variable gene and CDR3 regions assigned by MiXIR software. Corresponding epitope bins are included, as determined by competitive BLI and summarized in Figure S5.

| mAb        | Bin       | Light Chain Sequence |        |      |        |             |        |
|------------|-----------|----------------------|--------|------|--------|-------------|--------|
|            |           | CDR1                 | length | CDR2 | length | CDR3        | length |
| <u>3A2</u> | <u>1a</u> | QDVGTS               | 6      | WAS  | 3      | CQQYSSYPYTF | 11     |
| <u>3A7</u> | <u>1a</u> | QDVGTS               | 6      | WAS  | 3      | CQQYSSYPYTF | 11     |
| <u>3F5</u> | <u>1a</u> | QDVGTS               | 6      | WAS  | 3      | CQQYSSYPYTF | 11     |
| <u>3C6</u> | <u>1a</u> | QDVDTA               | 6      | WAS  | 3      | CQQYSSYPYTF | 11     |
| <u>3B3</u> | <u>1a</u> | SIVNY                | 5      | DTS  | 3      | CQQWSSYPYTF | 11     |
| <u>3G7</u> | <u>1b</u> | ESVDSYGNSF           | 10     | RAS  | 3      | CQQSNEDPWTF | 11     |
| <u>3C2</u> | <u>1b</u> | ETVDSYGNSF           | 10     | RAS  | 3      | CQQSNEDPWTF | 11     |
| <u>3H6</u> | <u>2</u>  | QSLVHSNGNTY          | 11     | KVS  | 3      | CSQSTHVPWTF | 11     |
| <u>3B3</u> | <u>3</u>  | QSLVHSNGNTY          | 11     | KVS  | 3      | CSQSTHVPWTF | 11     |
| <u>3F2</u> | <u>3</u>  | QSLLYSTNQKNY         | 12     | WAS  | 3      | CHQYSSYPWTF | 11     |
| <u>3E1</u> | <u>4</u>  | QSVSND               | 6      | YAS  | 3      | CQQDYSSPTF  | 10     |
| <u>3D3</u> | <u>4</u>  | QSVSND               | 6      | YAS  | 3      | CQQDYSSPTF  | 10     |
| <u>9F2</u> | <u>4</u>  | QSVSND               | 6      | YAS  | 3      | CQQDYSSPTF  | 10     |
| <u>3H4</u> | <u>4</u>  | QSVSND               | 6      | YAS  | 3      | CQQGYSSPLTF | 11     |
| <u>3B6</u> | <u>4</u>  | QSVSND               | 6      | YAS  | 3      | CQQDYSSPPTF | 11     |
| <u>3F6</u> | <u>4</u>  | QSVSND               | 6      | YAS  | 3      | CQQDYSSPPTF | 11     |
| <u>3F1</u> | <u>4</u>  | SSVSY                | 5      | HTS  | 3      | CQQYHGYPLTF | 11     |
| <u>3D5</u> | <u>4</u>  | QSVSND               | 6      | YAS  | 3      | CQQDYSSPTF  | 10     |
| <u>3B4</u> | <u>4</u>  | EDIYNH               | 6      | GAP  | 3      | CQQYWSTPYTF | 11     |
| <u>3C4</u> | <u>4</u>  | QNINVW               | 6      | KAS  | 3      | CQQGQSYPYTF | 11     |
| <u>3E4</u> | <u>4</u>  | QNINVW               | 6      | KAS  | 3      | CQQGQSYPYTF | 11     |
| <u>3F4</u> | <u>4</u>  | QTIGTW               | 6      | AAT  | 3      | CQQLYSTPLTF | 11     |
| <u>3D1</u> | <u>4</u>  | QDLYSF               | 6      | RAN  | 3      | CLQYDAFPWTF | 11     |
| <u>3G6</u> | <u>4</u>  | QDINSF               | 6      | RAN  | 3      | CLQYDEFPTF  | 11     |
| <u>3G2</u> | <u>4</u>  | QSVSND               | 6      | YAS  | 3      | CQQDYSSPTF  | 10     |
| <u>3D7</u> | <u>5</u>  | QSVSND               | 6      | YAS  | 3      | CQQGYSSPLTF | 11     |
| <u>3D2</u> | <u>5</u>  | QDVGTA               | 6      | WAS  | 3      | CQQYRTF     | 7      |
| <u>3E5</u> | <u>6</u>  | QDINNN               | 6      | HGT  | 3      | CVQSVQFPYTF | 11     |
| <u>3A1</u> | <u>6</u>  | ENIYSY               | 6      | NTK  | 3      | CQHHYGSPPTF | 11     |
| <u>3B1</u> | <u>6</u>  | SSVNY                | 5      | YTS  | 3      | CHQFTTSPWTF | 11     |
| <u>3G1</u> | <u>6</u>  | KSVSTSGYSY           | 10     | LAS  | 3      | CQHSRELPYTF | 11     |
| <u>3A6</u> | <u>6</u>  | SSVSY                | 5      | DTS  | 3      | CFQGSYGPPTF | 11     |

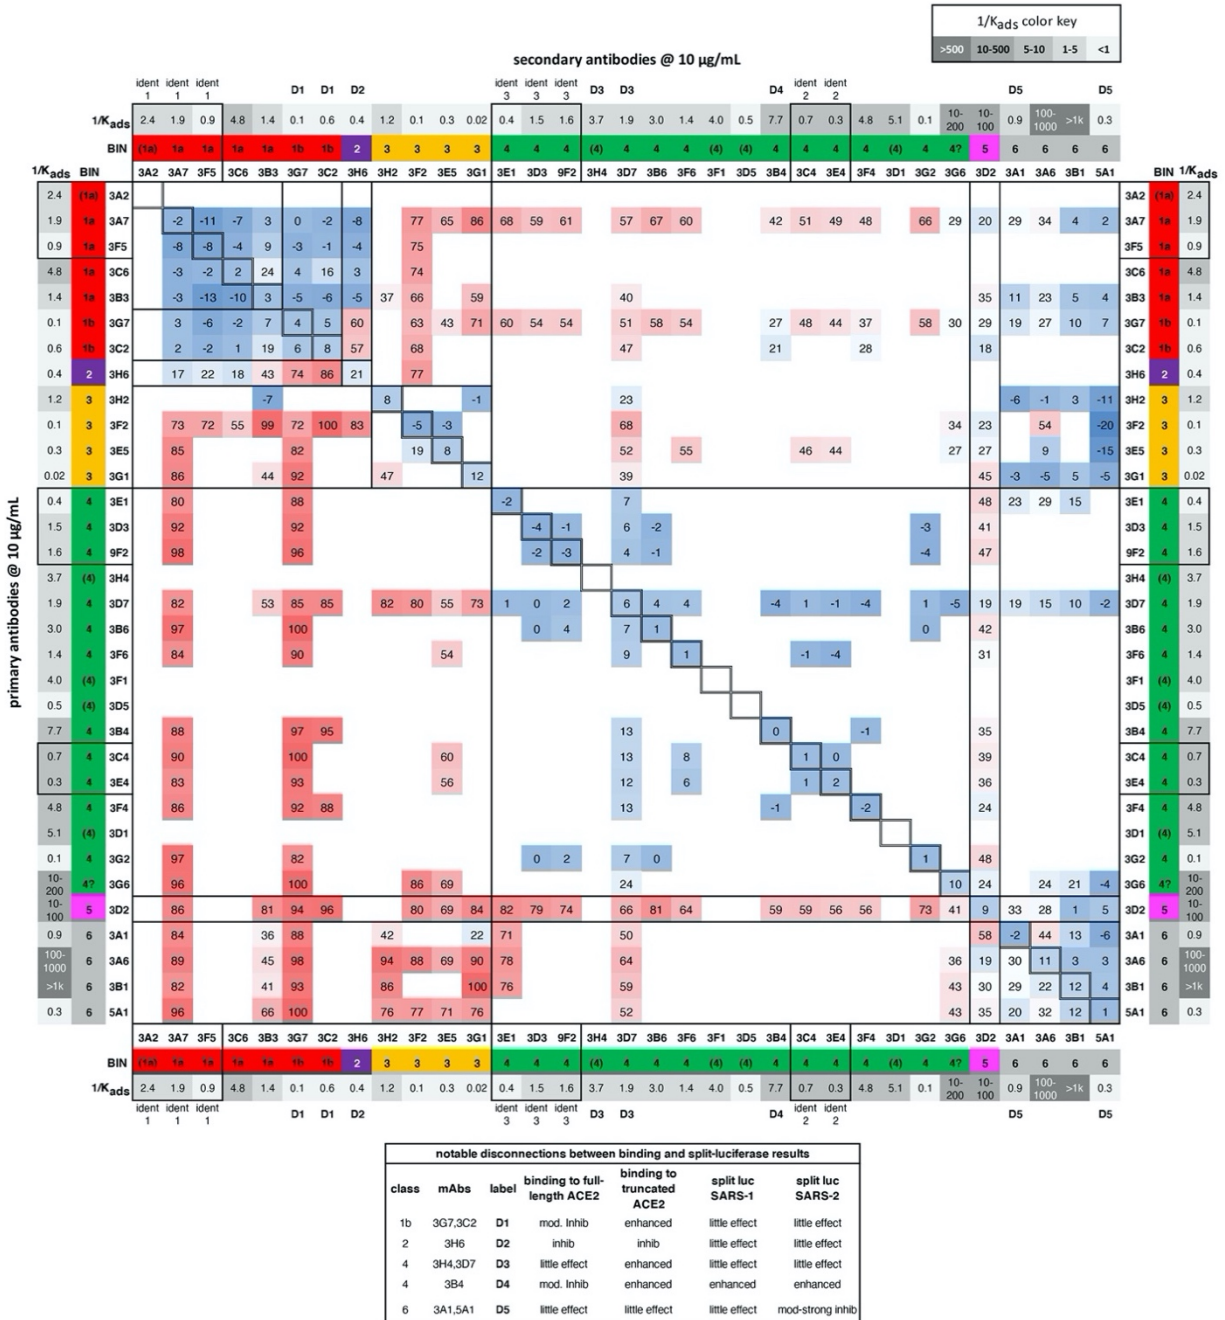

**Figure S6.** Collected from competitive binding experiments of the type shown in Figure 3f and Figure S6, performed on groups of up to 13 mAbs at a time. BLI values for each experiment were normalized to a maximum of 100 to allow for incorporation into this master dataset. Color-coded bin assignments are the same as done by sequence. When rows do not match columns, the avidities of the antibodies were usually significantly different, skewing the results of this competitive binding assay. Blank squares denote comparisons not made. Most of group 6 (5A1, 3B1, 3G4, 3C3, 3H5, 9B1) are included because some data was collected, but they were not sequenced and are omitted from the list of 33 selected antibodies discussed in the main text. The three sets of identical antibodies are denoted by “ident #”. The table at the bottom summarizes results described in the text concerning the experiments shown in Figure 4a vs. 4f, highlighting the connection between competitive binding, functional properties, and sequence.

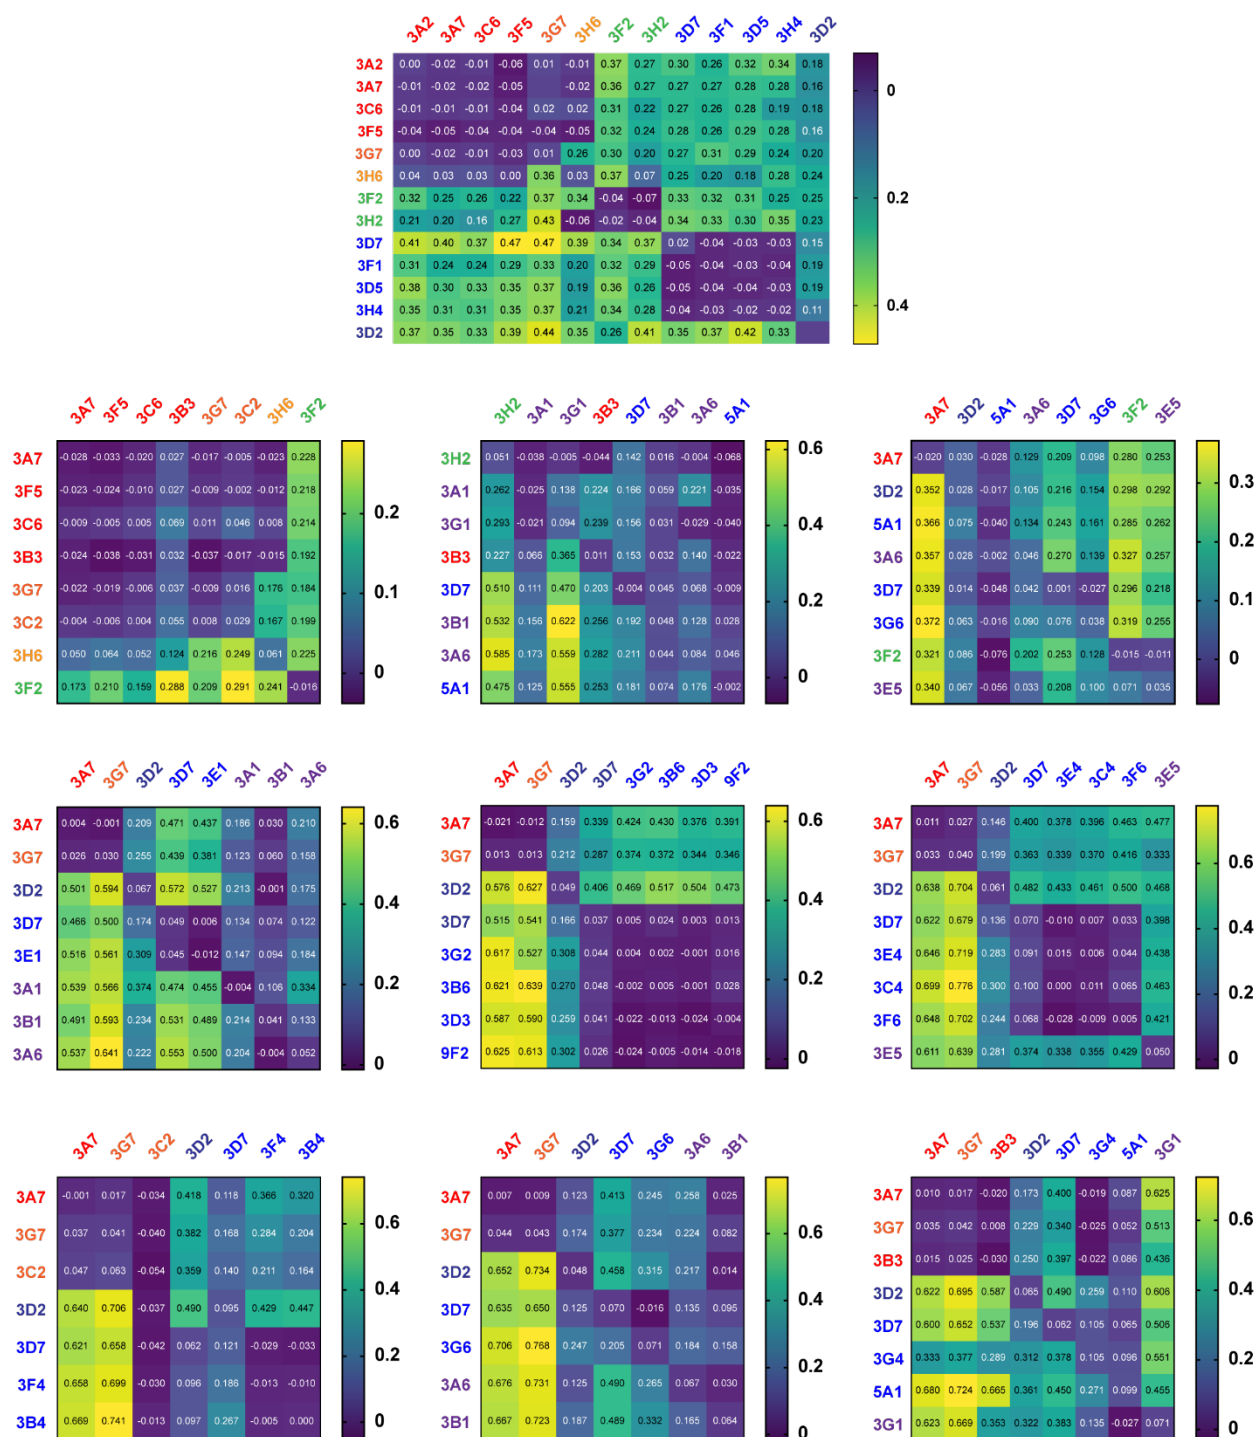

**Figure S7. Individual epitope binning results.** Epitope classification experiments performed by BLI. r-Spike ectodomain protein (bearing twin Strep-Tag II sequences) was immobilized on streptavidin-coated biosensors (10  $\mu\text{g/mL}$ ). Primary antibody (y axis) was incubated for 400 s, allowed to dissociate in buffer for 300 s, followed by incubation with secondary antibody (x axis) for 300 s. Data analyzed using ForteBio Octet Data Analysis software v. 10.0.
